# Supplementary material for: Reversible operation of chiral molecular scissors by redox and UV light
Source: Royal Society of Chemistry journal article supplement (doi:10.1039/b618248h), 2007-01-01
Supplement: b618248h.pdf [file b618248h.pdf]

## Supplementary Information

### Reversible Operation of Chiral Molecular Scissors by Redox and UV Light

Takahiro Muraoka,<sup>a</sup> Kazushi Kinbara<sup>\*a,b</sup> and Takuzo Aida<sup>\*a</sup>

<sup>a</sup> *Department of Chemistry and Biotechnology, School of Engineering, and Center for NanoBio Integration, The University of Tokyo, 7-3-1 Hongo, Bunkyo-ku, Tokyo 113-8656 Japan*

<sup>b</sup> *PRESTO, Japan Science Technology Agency (JST), 4-1-8 Honcho, Kawaguchi, Saitama 332-0012 Japan*

#### Table of Contents

1. Measurements
2. Cyclic Voltammetry of **1**
3. Absorption and CD Spectral Changes of (1*S*,1'*S*)-**1**<sup>III</sup> upon Reduction
4. HPLC Analysis of (1*S*,1'*S*)-**1**

## 1. Measurements

Electronic absorption and circular dichroism (CD) spectra were recorded on a JASCO type V-560 spectrometer and a JASCO type J-720 spectropolarimeter, respectively. Analytical HPLC was performed at 20 °C using a 4.6 mm- $\phi$   $\times$  250 mm long silica gel column (Mightysil Si60) on a JASCO Type PU-980 HPLC pump, equipped with a JASCO Type UV-970 variable-wavelength UV-Vis detector. Cyclic voltammetry was carried out on an ALS/CHI619B Electro-chemical Analyzer (BAS) using platinum-wire working and counter electrodes and a reference silver-wire electrode RE-5 (BAS). Scan rate was 0.1 V s<sup>-1</sup>. Sample solutions (0.2 mM in CH<sub>2</sub>Cl<sub>2</sub>) containing Bu<sub>4</sub>NPF<sub>6</sub> (0.1 M) as a supporting electrolyte were degassed by three freeze-to-thaw cycles before measurements.

## 2. Cyclic Voltammetry of 1

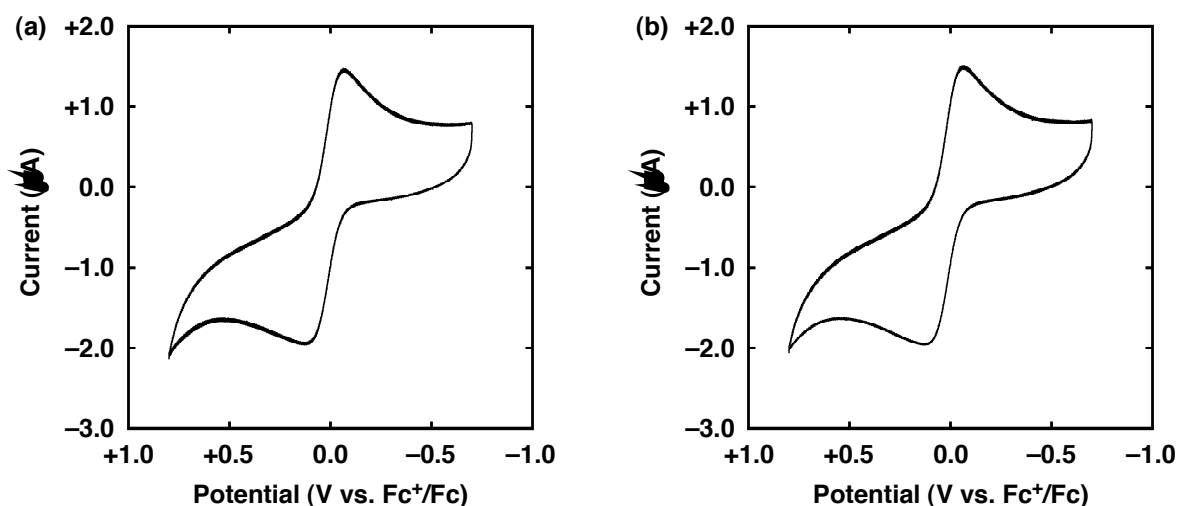

**Fig. S1** Cyclic voltammograms of (a) *trans*-1 and (b) *cis*-1 (contaminated by 16% with *trans*-1) in CH<sub>2</sub>Cl<sub>2</sub> (0.2 mM) containing 0.1 M Bu<sub>4</sub>NPF<sub>6</sub> at 20 °C.

### 3. Absorption and CD Spectral Changes of (1*S*,1'*S*)-1<sup>III</sup> upon Reduction

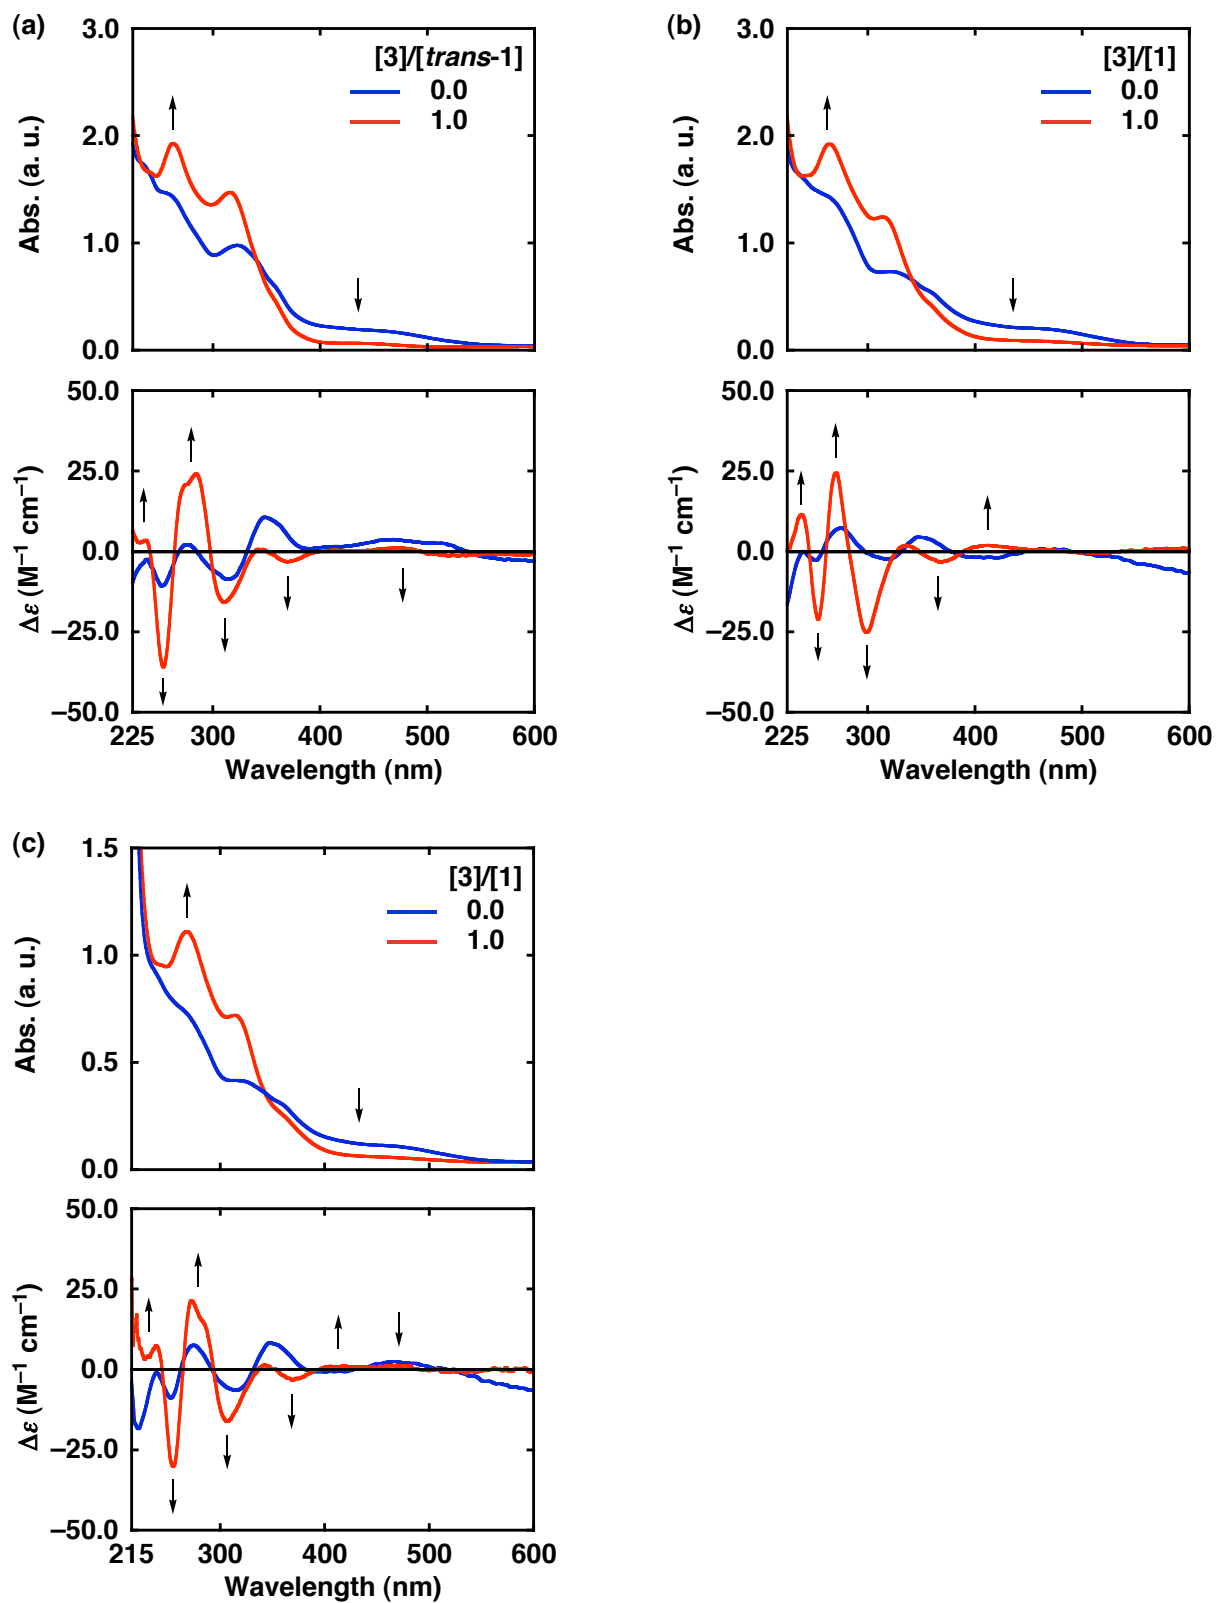

**Fig. S2** (a) Absorption (upper) and CD (lower) spectral changes at 20 °C of a CH<sub>2</sub>Cl<sub>2</sub> solution of (1*S*,1'*S*)-*trans*-**1**<sup>III</sup> (generated by oxidation of (1*S*,1'*S*)-*trans*-**1**<sup>II</sup> ( $1.8 \times 10^{-4}$  M) with a stoichiometric amount of **2**) upon addition of a stoichiometric amount of reductant **3**. (b) Absorption (upper) and CD (lower) spectral changes at 20 °C of a CH<sub>2</sub>Cl<sub>2</sub> solution of (1*S*,1'*S*)-**1**<sup>III</sup> (generated by oxidation of (1*S*,1'*S*)-**1**<sup>II</sup> ( $2.1 \times 10^{-4}$  M; *trans/cis* = 16/84) with a stoichiometric amount of **2**) upon addition of a stoichiometric amount of reductant **3**. (c) Absorption (upper) and CD (lower) spectral changes at 20 °C of a CH<sub>2</sub>Cl<sub>2</sub> solution of (1*S*,1'*S*)-**1**<sup>III</sup> (generated by oxidation of (1*S*,1'*S*)-**1**<sup>II</sup> ( $1.1 \times 10^{-4}$  M; *trans/cis* = 16/84) with a stoichiometric amount of **2**, followed by UV ( $\lambda = 350 \pm 10$  nm) irradiation for 60 s) upon addition of a stoichiometric amount of reductant **3**. Arrows indicate directions of the spectral changes.

#### 4. HPLC Analysis of (1*S*,1'*S*)-1

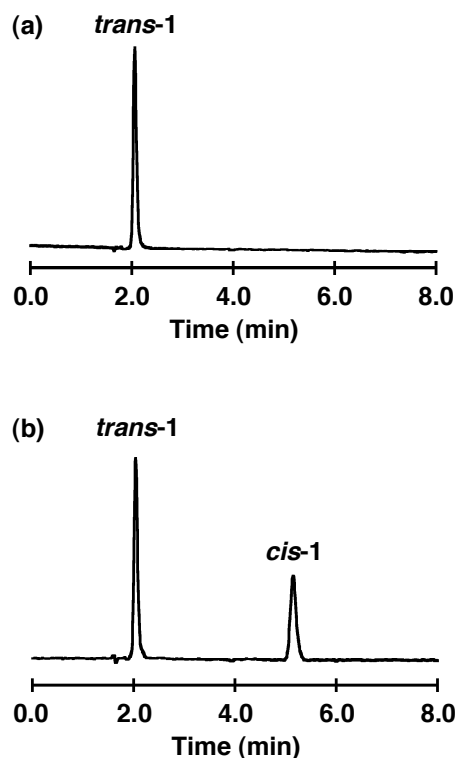

**Fig. S3** HPLC chromatograms of (a) (1*S*,1'*S*)-*trans*-**1**<sup>II</sup> as a reference and (b) an isomer mixture of (1*S*,1'*S*)-**1**<sup>II</sup>, generated from (1*S*,1'*S*)-**1**<sup>III</sup> (*trans/cis* = 16/84) by UV irradiation for 60 s, followed by addition of a stoichiometric amount of reductant **3**. HPLC was performed at 20 °C with a Mightysil Si60 column using CH<sub>2</sub>Cl<sub>2</sub>/hexane (40/60) as an eluent at a flow rate of 2.0 mL min<sup>-1</sup>, and the chromatograms were obtained by monitoring the absorbance at 369.0 nm, an isosbestic point for the photoisomerization of **1**<sup>II</sup> in CH<sub>2</sub>Cl<sub>2</sub>/hexane (40/60).
